# Supplementary material for: Sprague Dawley Rats Show More Severe Bone Loss, Osteophytosis and Inflammation Compared to Wistar Han Rats in a High-Fat, High-Sucrose Diet Model of Joint Damage
Source: Int J Mol Sci. 2022 Mar 28;23(7):3725. doi: 10.3390/ijms23073725 (PMC8999132; doi:10.3390/ijms23073725)
Supplement: Supplementary file 1 [file ijms-23-03725-s001.zip › ijms-1641054-supplementary.pdf]

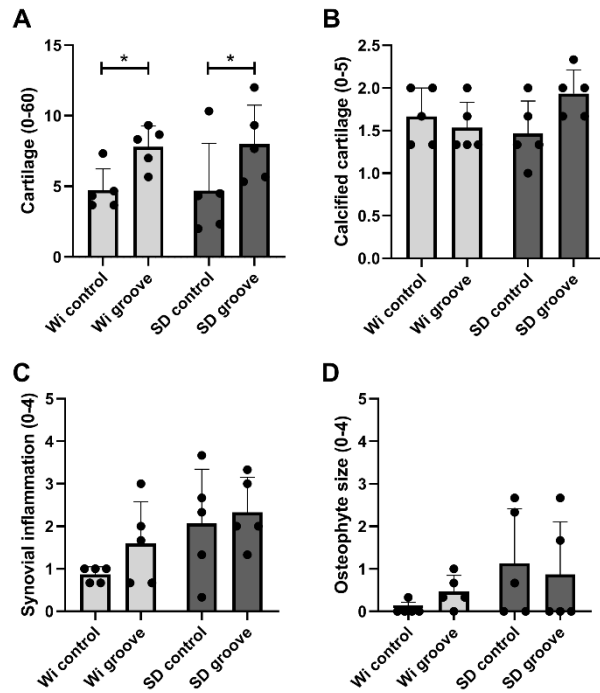

**Supplementary figure S1.** OARSI subscores. (A) Cartilage degeneration (0-60), (B) calcified cartilage (0-5), (C) synovial inflammation (0-4) and (D) osteophyte size (0-4).  $p \leq 0.05$  is \*.

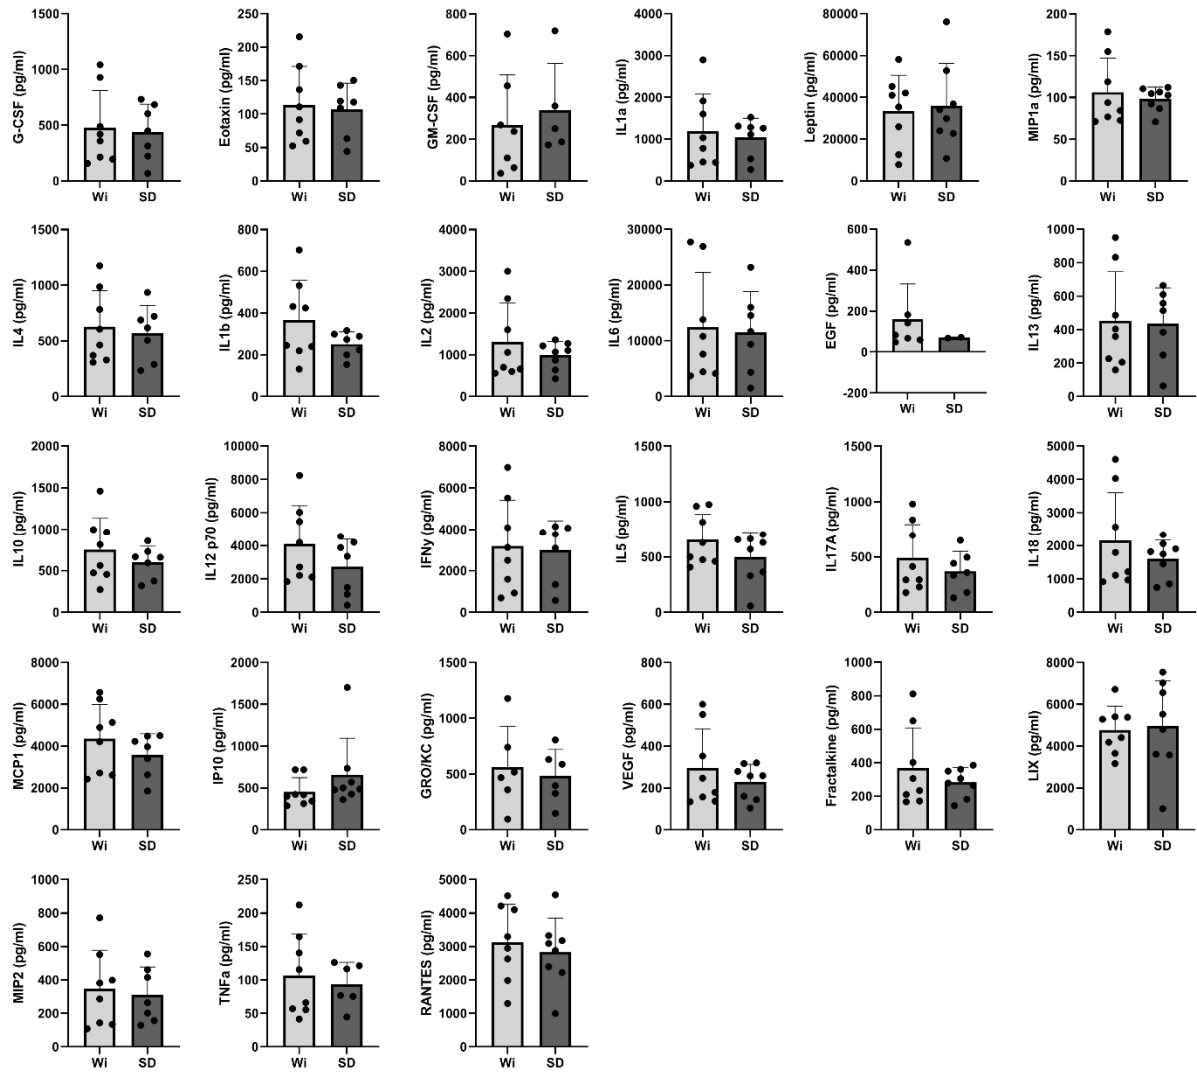

**Supplementary figure S2.** Inflammatory serum markers. Results of the 27 multiplex-assay showing all measured cytokines and chemokines from week 24 serum.

# Week 24

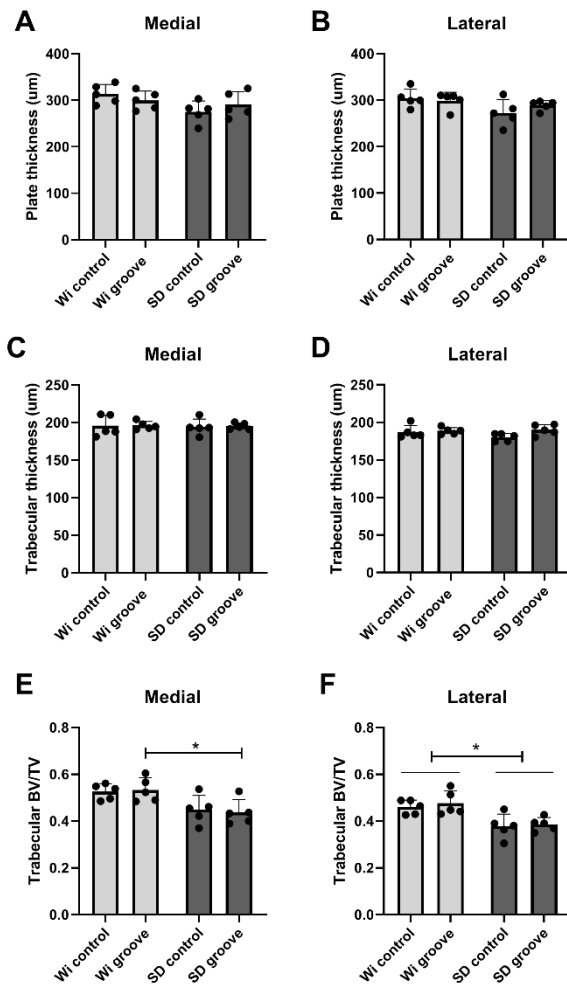

**Supplementary figure S3.** Absolute week 24  $\mu$ CT measurements. Medial and lateral (A,B) tibial plate thickness, (C,D) tibial trabecular bone thickness and (E,F) tibial bone volume fraction.  $p \leq 0.05$  is \*.

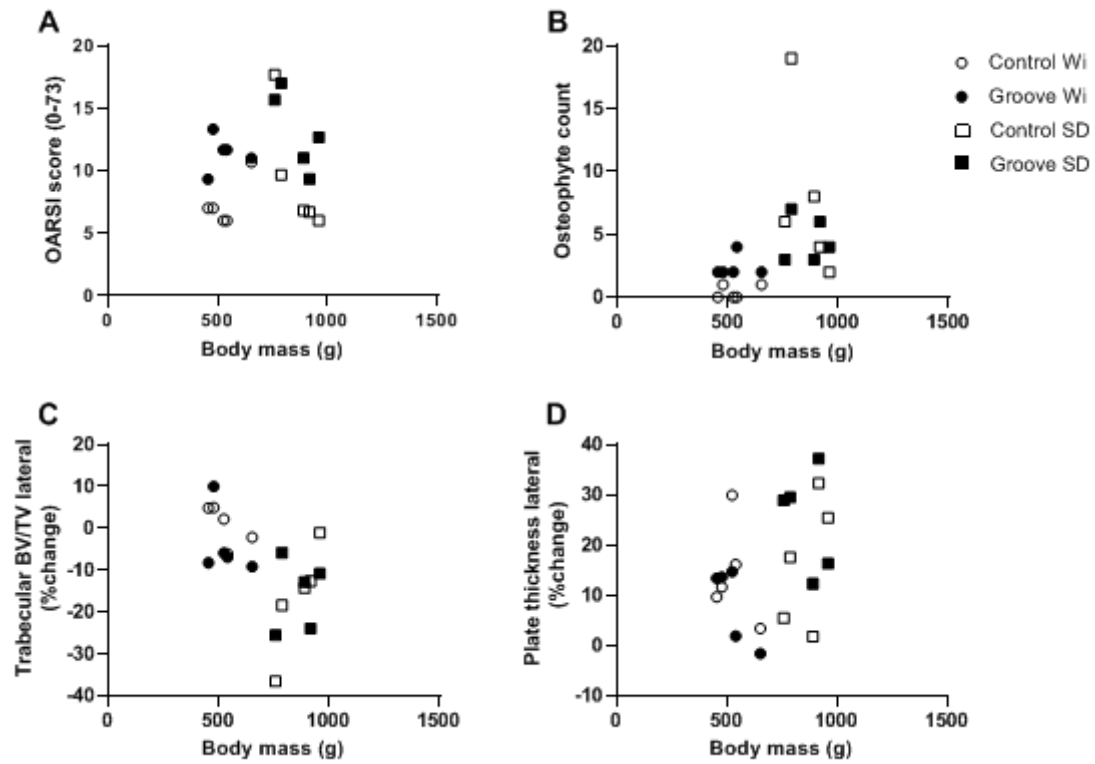

**Supplementary figure S4.** Body mass correlations. Correlation between body mass and (A) OARSI score, (B) osteophyte count, (C) percent change in bone volumetric fraction and (D) percent change in tibial plate thickness.
